# Supplementary material for: Morphology and Mitochondrial Lineage Investigations Corroborate the Systematic Status and Pliocene Colonization of Suncus niger (Mammalia: Eulipotyphla) in the Western Ghats Biodiversity Hotspot of India
Source: MDPI journal article supplement (doi:10.3390/genes14071493), 2023-07-22
Supplement: s1 [file s1]

**Table S1.** Details of the generated and GenBank sequences of *S.* species used in the present datasets.

| <b>Species</b>             | <b>Gene</b> | <b>Accession No.</b> | <b>Voucher No.</b>      | <b>Locality</b> | <b>Reference</b>    |
|----------------------------|-------------|----------------------|-------------------------|-----------------|---------------------|
| <i>S. niger</i>            | Cytb        | OQ596434             | ZSI/WGRC/V.3624         | India           | This Study          |
| <i>S. niger</i>            | Cytb        | OR088213             | ZSI/WGRC/V.3636         | India           | This Study          |
| <i>S. niger</i>            | Cytb        | OR088214             | ZSI/WGRC/V.3637         | India           | This Study          |
| <i>S. montanus</i>         | Cytb        | DQ630388             | IZEA V573               | India           | [9]                 |
| <i>S. megalura</i>         | Cytb        | MH806053             | VN1416/MNHN-ZM-2013-571 | Guinea          | Nicolas et al. 2019 |
| <i>S. varilla</i>          | Cytb        | DQ630433             | IZEA 3                  | South Africa    | [9]                 |
| <i>S. varilla</i>          | Cytb        | DQ630434             | IZEA 4                  | South Africa    | [9]                 |
| <i>S. remyi</i>            | Cytb        | DQ630399             | SBP GA3650              | Gabon           | [9]                 |
| <i>S. hututsi</i>          | Cytb        | KF876416             | FMNH207302              | Rwanda          | Demos et al. 2014   |
| <i>S. hututsi</i>          | Cytb        | KF876417             | FMNH 207303             | Rwanda          | Demos et al. 2014   |
| <i>S. etruscus</i>         | Cytb        | LR536371             | TAUM14251               | Israel          | [25]                |
| <i>S. etruscus</i>         | Cytb        | LR536369             | TAUM14397               | Israel          | [25]                |
| <i>S. etruscus</i>         | Cytb        | LR536370             | TAUM14402               | Israel          | [25]                |
| <i>S. madagascariensis</i> | Cytb        | MH673727             | 4775                    | Iran            | [17]                |
| <i>S. madagascariensis</i> | Cytb        | MH673728             | 4776                    | Iran            | [17]                |
| <i>S. madagascariensis</i> | Cytb        | MH673729             | saAM                    | Iran            | [17]                |
| <i>S. malayanus</i>        | Cytb        | JF817392             | ZO-SMAL(CH)-02          | Malaysia        | [20]                |
| <i>S. malayanus</i>        | Cytb        | JF817391             | ZO-SMAL(PP)-01          | Malaysia        | [20]                |
| <i>S. malayanus</i>        | Cytb        | JF817393             | ZO-SMAL(BR)-03          | Malaysia        | [20]                |
| <i>S. fellowesgordoni</i>  | Cytb        | JF914982             | WHT 6819                | Sri Lanka       | [15]                |
| <i>S. fellowesgordoni</i>  | Cytb        | JF914981             | WHT 6818                | Sri Lanka       | [15]                |
| <i>S. fellowesgordoni</i>  | Cytb        | JF914980             | WHT 6817                | Sri Lanka       | [15]                |
| <i>S. dayi</i>             | Cytb        | DQ630389             | IZEA V567               | India           | [9]                 |
| <i>S. dayi</i>             | Cytb        | DQ630432             | IZEA V576               | India           | [9]                 |
| <i>S. stoliczkanus</i>     | Cytb        | AB175076             | HA7268                  | Nepal           | [19]                |
| <i>S. stoliczkanus</i>     | Cytb        | AB175077             | HA7270                  | Nepal           | [19]                |
| <i>S. murinus</i>          | Cytb        | MT366134             | NPAR0587                | Nepal           | GenBank             |
| <i>S. murinus</i>          | Cytb        | GQ290372             | WHT6907                 | Sri Lanka       | [8]                 |
| <i>S. murinus</i>          | Cytb        | MW075603             | S3717                   | China           | GenBank             |
| <i>S. murinus</i>          | Cytb        | GQ290379             | WHT6924                 | Sri Lanka       | [8]                 |
| <i>S. murinus</i>          | Cytb        | GQ290380             | WHT6928                 | Sri Lanka       | [8]                 |
| <i>S. montanus</i>         | Cytb        | GQ290368             | WHT 6796                | Sri Lanka       | [8]                 |
| <i>S. montanus</i>         | Cytb        | GQ290369             | WHT6815                 | Sri Lanka       | [8]                 |
| <i>S. montanus</i>         | Cytb        | GQ290370             | WHT6816                 | Sri Lanka       | [8]                 |
| <i>S. montanus</i>         | Cytb        | GQ290371             | WHT6822                 | Sri Lanka       | [8]                 |
| <i>S. montanus</i>         | Cytb        | GQ290373             | WHT6855                 | Sri Lanka       | [8]                 |
| <i>S. montanus</i>         | Cytb        | GQ290375             | WHT6848                 | Sri Lanka       | [8]                 |
| <i>S. montanus</i>         | Cytb        | GQ290376             | WHT6850                 | Sri Lanka       | [8]                 |
| <i>S. montanus</i>         | Cytb        | GQ290378             | WHT6841                 | Sri Lanka       | [8]                 |
| <i>S. montanus</i>         | Cytb        | FJ716833             | WHT6860                 | Sri Lanka       | [7]                 |
| <i>S. montanus</i>         | Cytb        | FJ716834             | WHT 6840                | Sri Lanka       | [7]                 |
| <i>S. montanus</i>         | Cytb        | FJ716835             | WHT 6852                | Sri Lanka       | [7]                 |
| <i>S. montanus</i>         | Cytb        | FJ716837             | WHT 6814                | Sri Lanka       | [7]                 |
| <i>S. montanus</i>         | Cytb        | GQ290374             | WHT 6847                | Sri Lanka       | [8]                 |
| <i>S. montanus</i>         | Cytb        | GQ290377             | WHT6851                 | Sri Lanka       | [8]                 |
| <i>S. niger</i>            | 16s rRNA    | OQ600602             | ZSI/WGRC/V.3624         | India           | This Study          |
| <i>S. niger</i>            | 16s rRNA    | OR077329             | ZSI/WGRC/V.3636         | India           | This Study          |
| <i>S. niger</i>            | 16s rRNA    | OR077330             | ZSI/WGRC/V.3637         | India           | This Study          |
| <i>S. montanus</i>         | 16s rRNA    | DQ630304             | IZEA V573               | India           | [9]                 |
| <i>S. montanus</i>         | 16s rRNA    | EF524884             | IZEAV559                |                 | [10]                |
| <i>S. murinus</i>          | 16s rRNA    | GQ290356             | WHT6928                 | Sri Lanka       | [8]                 |

|                    |          |          |          |             |      |
|--------------------|----------|----------|----------|-------------|------|
| <i>S. murinus</i>  | 16s rRNA | EU122208 | WHT 6906 | Sri Lanka   | [8]  |
| <i>S. murinus</i>  | 16s rRNA | EF524864 | LRH3544  | Philippines | [10] |
| <i>S. murinus</i>  | 16s rRNA | DQ630306 | ZEA V546 | India       | [9]  |
| <i>S. murinus</i>  | 16s rRNA | EF524885 | IZEAV554 | India       | [10] |
| <i>S. montanus</i> | 16s rRNA | GQ290351 | WHT6848  | Sri Lanka   | [8]  |
| <i>S. montanus</i> | 16s rRNA | GQ290352 | WHT6850  | Sri Lanka   | [8]  |
| <i>S. montanus</i> | 16s rRNA | GQ290354 | WHT6941  | Sri Lanka   | [8]  |
| <i>S. montanus</i> | 16s rRNA | GQ290344 | WHT 6796 | Sri Lanka   | [8]  |
| <i>S. montanus</i> | 16s rRNA | GQ290345 | WHT6815  | Sri Lanka   | [8]  |
| <i>S. montanus</i> | 16s rRNA | FJ716828 | WHT6814  | Sri Lanka   | [7]  |
| <i>S. montanus</i> | 16s rRNA | FJ716829 | WHT6860  | Sri Lanka   | [7]  |
| <i>S. montanus</i> | 16s rRNA | FJ716830 | WHT6840  | Sri Lanka   | [7]  |
| <i>S. montanus</i> | 16s rRNA | GQ290346 | WHT6816  | Sri Lanka   | [8]  |
| <i>S. montanus</i> | 16s rRNA | GQ290347 | WHT6822  | Sri Lanka   | [8]  |
| <i>S. montanus</i> | 16s rRNA | GQ290349 | WHT6855  | Sri Lanka   | [8]  |
| <i>S. montanus</i> | 16s rRNA | FJ716831 | WHT6852  | Sri Lanka   | [7]  |
| <i>S. montanus</i> | 16s rRNA | GQ290350 | WHT 6847 | Sri Lanka   | [8]  |
| <i>S. montanus</i> | 16s rRNA | GQ290353 | WHT6851  | Sri Lanka   | [8]  |

#### Additional References:

- 72 Nicolas, V.; Jacquet, F.; Hutterer, R.; Konečný, A.; Kouassi, S.K.; Durnez, L.; Lalis, A.; Colyn, M.; Denys, C. Multilocus Phylogeny of the *Crocidura Poensis* Species Complex (Mammalia, Eulipotyphla): Influences of the Palaeoclimate on Its Diversification and Evolution. *J. Biogeogr.* **2019**, *46*, 871-883.
- 73 Demos, T.C.; Kerbis Peterhans, J.C.; Agwanda, B.; Hickerson, M.J. Uncovering cryptic diversity and refugial persistence among small mammal lineages across the Eastern Afromontane biodiversity hotspot. *Mol. Phylogenet. Evol.* **2014**, *71*, 41-54.
